# Supplementary material
Source: publisher site journal article supplement (doi:10.18632/aging.206384)
Supplement: Supplementary file 2 [file aging-v18i1-206384-supplementary-material-SD1.pdf]

**SUPPLEMENTARY FIGURES**

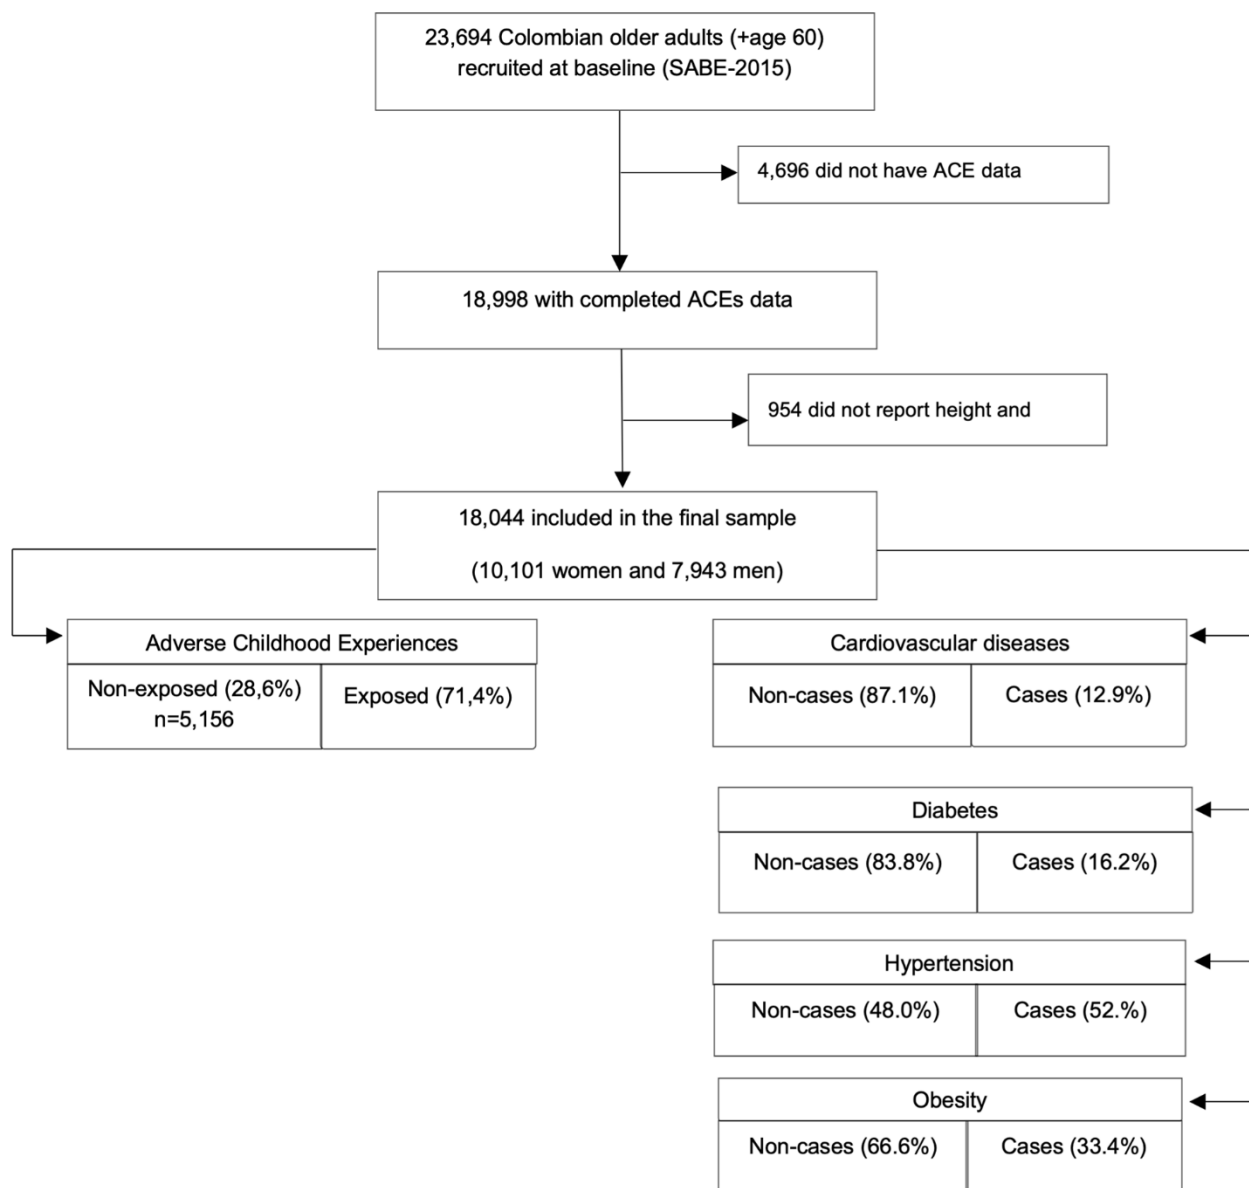

**Supplementary Figure 1. Study population selection process and profile.**

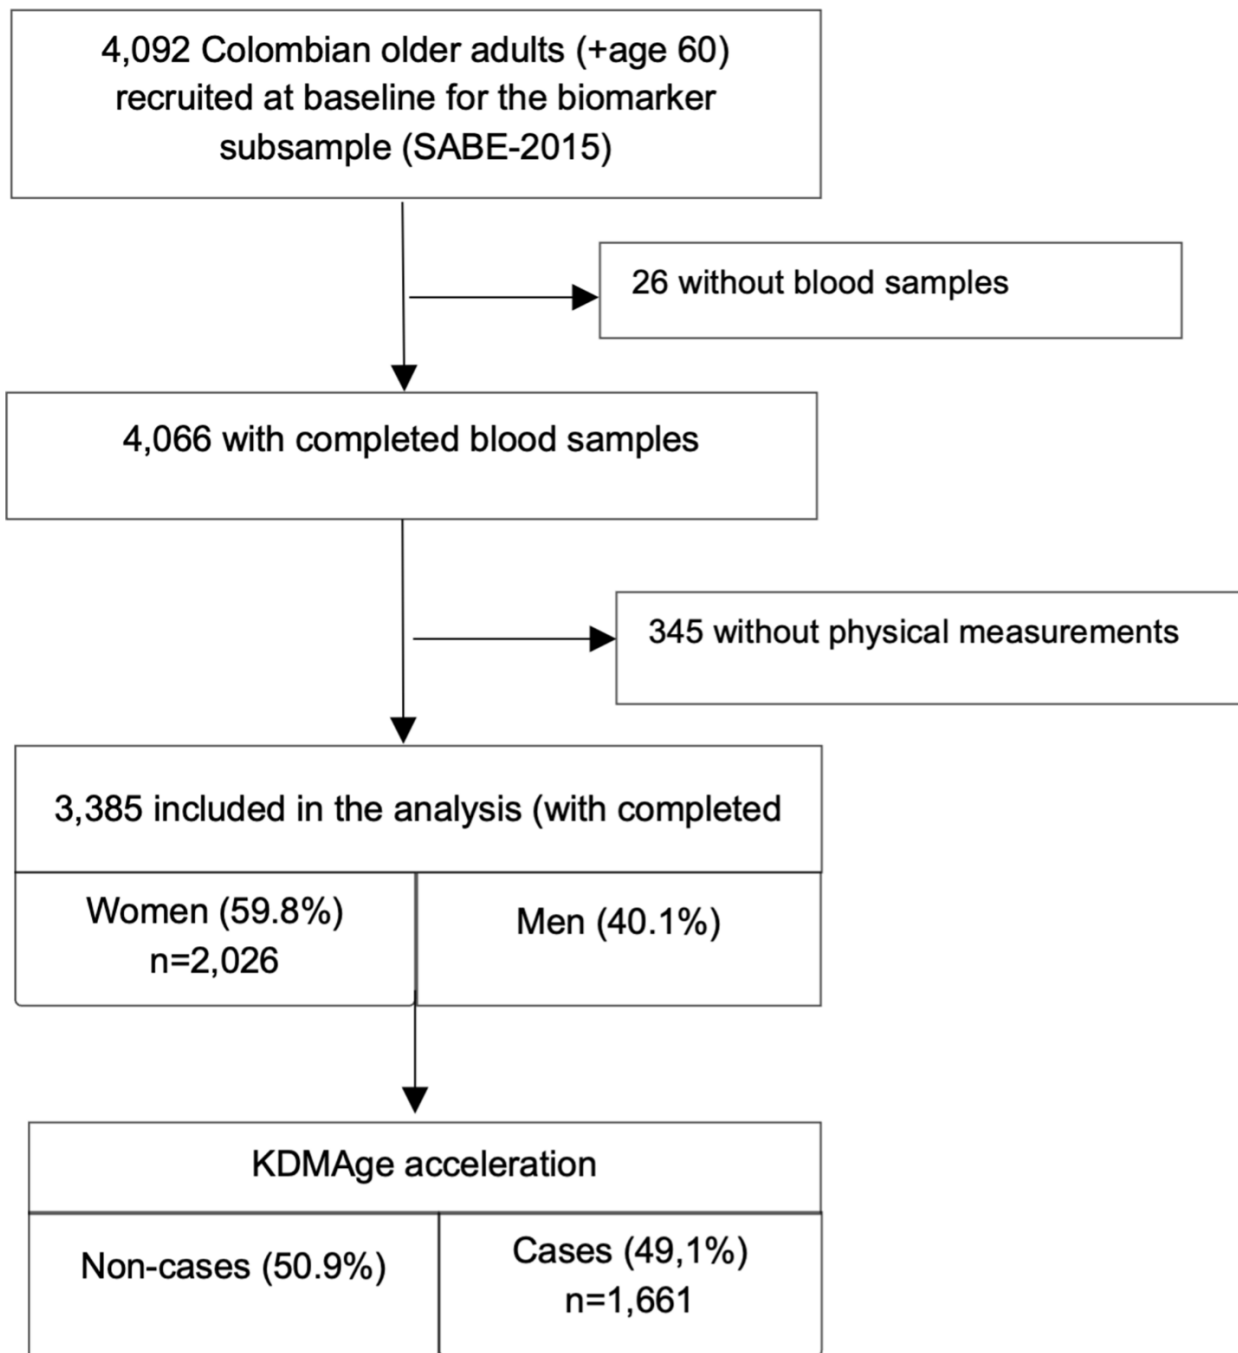

Supplementary Figure 2. Study population selection process and profile (Subsample of biomarkers).

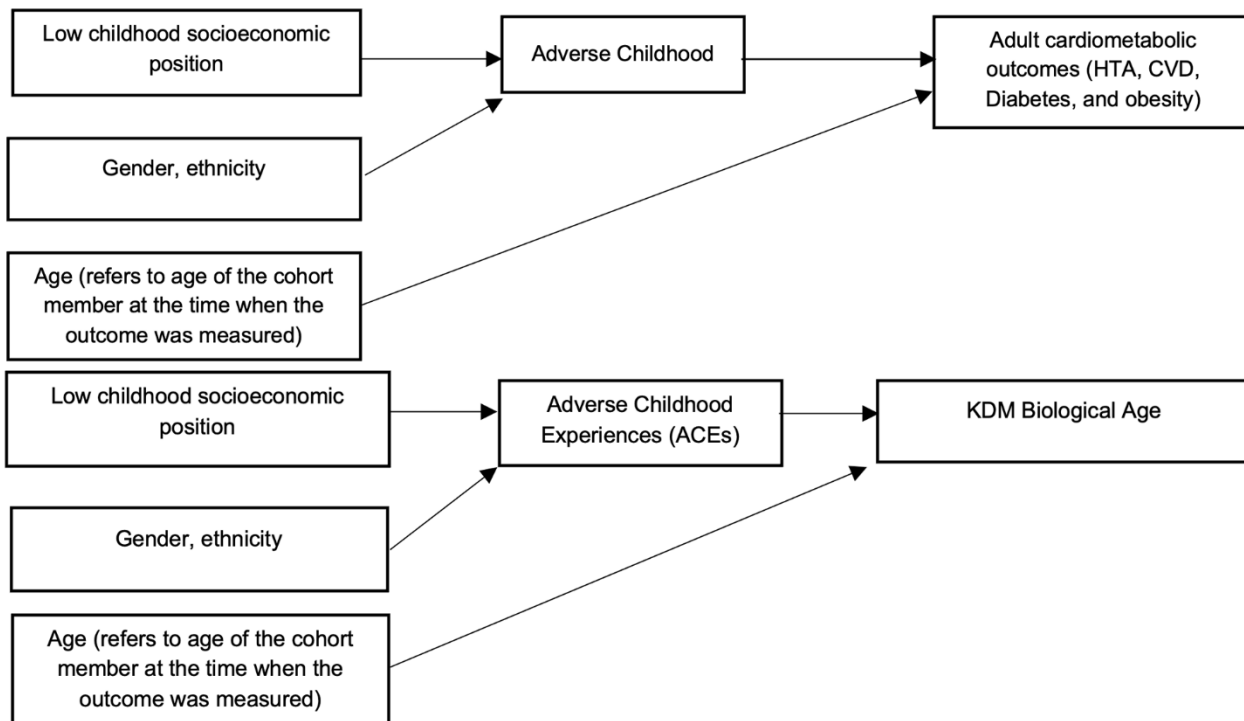

**Supplementary Figure 3.** This study is guided by the direct causal path and the indirect causal path of childhood adversity as exposures on adult health outcomes and biological ageing.
