# Supplementary material
Source: publisher site journal article supplement (doi:10.18632/aging.206384)
Supplement: Supplementary file 3 [file aging-v18i1-206384-supplementary-material-SD2.pdf]

## SUPPLEMENTARY TABLES

Please browse Full Text version to see the data of Supplementary Tables 4, 5.

**Supplementary Table 1. Biomarkers Included in the SABE-COLOMBIA Biological Age Versions.**

| Biomarkers                   | KDMAge men | KDMAge women |
|------------------------------|------------|--------------|
| Triglycerides                | Yes        | -            |
| HbA1c                        | Yes        | Yes          |
| Low-Density lipoprotein      | Yes        | Yes          |
| High-Density Lipoprotein     | Yes        | -            |
| Non-High-density Lipoprotein | Yes        | Yes          |
| Total cholesterol            | Yes        | Yes          |
| Systolic blood pressure      | Yes        | Yes          |
| A Body Shape Index           | Yes        | Yes          |
| Body mass index              | Yes        | Yes          |
| Calf circumference           | Yes        | Yes          |
| Arm circumference            | Yes        | Yes          |

**Supplementary Table 2. Definition and estimation of the Klemera-Doubal Method Biological Age (KDMAge).**

| Items          | Klemera-Doubal Method Biological Age (KDMAge)                                                                                                                                                                                                                                                                                   |
|----------------|---------------------------------------------------------------------------------------------------------------------------------------------------------------------------------------------------------------------------------------------------------------------------------------------------------------------------------|
| Description    | KDMAge is computed based on regression models of biomarkers on age and represents the predicted physiological age of an individual (72).                                                                                                                                                                                        |
| Methods        | The equation takes information from m number of regression lines of chronological age regressed on m biomarkers:<br>$KDM \text{ Biological Age} = \frac{\sum_{j=1}^m (x_j - q_j) \frac{k_j}{S_j^2} + \frac{a}{S_{BA}^2}}{\sum_{j=1}^m \left( \frac{k_j}{S_j} \right)^2 + \frac{1}{S_{BA}^2}}$                                   |
| Interpretation | Positive KDMAge residual suggests that the individual is aging faster than their chronological age, meaning their biological age is higher than their actual age. $\Delta$ KDMAge residual values greater than 0, suggest faster biological ageing, whereas values less than or equal to 0, indicates slower biological ageing. |
| Advantages     | Provides reliable and stable results and has been validated in different population samples.                                                                                                                                                                                                                                    |

**Supplementary Table 3. Summary statistics for the study population with biomarkers available.**

| <b>Characteristics</b>                                     | <b>Women (N=2,026)</b> | <b>Men (N=1,359)</b> | <b>Overall (N=3,385)</b> |
|------------------------------------------------------------|------------------------|----------------------|--------------------------|
| Chronological age (year), mean ± SD <sup>a</sup>           | 68.8 (6.94)            | 69.7 (7.24)          | 69.1 (7.07)              |
| Biological age KDMAge (years), mean ± SD <sup>a</sup>      | 68.8 (9.34)            | 69.7 (10.4)          | 69.1 (9.77)              |
| ΔKDMAge residual                                           | 0.00 (6.25)            | 0.00 (7.42)          | 0.00 (6.74)              |
| KDMAge acceleration <sup>b</sup>                           | 1,006 (49.7%)          | 655 (48.2%)          | 1,661 (49.1%)            |
| KDMAge non-acceleration                                    | 1,020 (50.3%)          | 704 (51.8%)          | 1,724 (50.9%)            |
| <b>Biomarkers included in KDMAge algorithms, mean ± SD</b> |                        |                      |                          |
| HbA1c (%)                                                  | 13.4 (1.28)            | 14.1 (1.23)          | 13.6 (1.31)              |
| Low-density lipoprotein LDL (mg/dL)                        | 127 (31.8)             | 120 (31.5)           | 124 (31.9)               |
| High-density lipoprotein HDL (mg/dL)                       | 46.5 (11.1)            | 41.2 (10.6)          | 44.4 (11.2)              |
| Total Cholesterol (mg/dL)                                  | 200 (38.0)             | 185 (37.4)           | 194 (38.4)               |
| Non-HDL (mg/dL)                                            | 154 (38.2)             | 144 (37.3)           | 150 (38.1)               |
| Triglycerides (mg/dL)                                      | 151 (53.9)             | 144 (54.0)           | 148 (54.0)               |
| Glucose (mg/dL)                                            | 93.9 (9.30)            | 93.4 (9.76)          | 93.7 (9.49)              |
| SBP (mm Hg)                                                | 138 (23.9)             | 140 (25.0)           | 139 (24.3)               |
| Calf circumference (cm)                                    | 34.8 (3.85)            | 34.5 (3.42)          | 34.7 (3.68)              |
| Arm circumference (cm)                                     | 29.2 (4.14)            | 28.0 (3.25)          | 28.7 (3.85)              |
| A body shape index (ABSI)                                  | 0.082 (0.006)          | 0.083 (0.005)        | 0.083 (0.006)            |
| Body-mass index BMI                                        | 27.8 (4.99)            | 26.3 (4.18)          | 27.2 (4.74)              |

(a) Included 3,385 participants for analysis. Mean values (standard deviation) for continuous variables and n (%) for categorical variables. (b) Employed to construct KDMAge. (c) Cardiovascular diseases, diabetes and hypertension self-reported. (e) BMI ≥ 30 kg/m<sup>2</sup> or higher defines obesity.
